# Supplementary material for: Generating Spatial Referring Expressions in a Social Robot: Dynamic vs. Non-ambiguous
Source: Front Robot AI. 2019 Aug 2;6:67. doi: 10.3389/frobt.2019.00067 (PMC7805879; doi:10.3389/frobt.2019.00067)
Supplement: Supplementary file 1 [file Table_1.XLS]

## Sheet: logs
Transcript of a Participant’s Interaction in our Study as an Example
Time(s)	Event
0	Start Round 1 – Dynamic
0.389	Robot begins description
0.39	a hospital is above a commercial district
3.047	Robot ends description
8.695	Participant starts touching screen
8.7	Robot begins description
8.7	a hospital is above a commercial district
11.282	Robot ends description
12.28	Participant stops touching screen
13.886	Participant starts touching screen
14.212	Robot begins description
14.213	yup
14.729	Participant stops touching screen
14.779	Robot ends description
16.716	First object is successfully placed.
18.213	Robot begins description
18.213	a hospital is above a residence
20.431	Robot ends description
22.451	Robot begins description
22.452	and to the right of a residence
24.215	Robot ends description
27.321	Participant starts touching screen
27.776	Robot begins description
27.776	right
28.443	Robot ends description
30.829	Participant stops touching screen
32.323	Robot begins description
32.324	right
32.828	Second object is successfully placed.
33.002	Robot ends description
36.329	Robot begins description
36.329	a residence is below a police department
38.96	Robot ends description
41.828	Participant starts touching screen
43.04	Robot begins description
43.04	yes
43.823	Robot ends description
44.39	Participant stops touching screen
46.396	Third object is successfully placed.
47.898	Robot begins description
47.899	a hospital is above a police department
50.618	Robot ends description
55.473	Participant starts touching screen
55.841	Robot begins description
55.841	no
56.554	Robot ends description
58.803	Participant stops touching screen
59.631	Robot begins description
59.631	and to the left of a fire department
61.998	Robot ends description
63.973	Participant starts touching screen
64.485	Robot begins description
64.486	nope
65.219	Robot ends description
65.802	Participant stops touching screen
68.356	Robot begins description
68.356	and below a residence
69.841	Robot ends description
75.976	Robot begins description
75.977	and below a residence
77.489	Robot ends description
79.588	Participant starts touching screen
80.632	Robot begins description
80.632	right
81.299	Robot ends description
84.801	Robot begins description
84.802	a hospital is above a police department
87.351	Robot ends description
88.231	no
88.232	Robot begins description
88.93	Robot ends description
91.413	Robot begins description
91.414	no
92.096	Robot ends description
95.814	Robot begins description
95.814	a hospital is above a police department
98.412	Robot ends description
100.512	Participant stops touching screen
101.468	Robot begins description
101.468	and below a residence
101.506	Participant starts touching screen
102.361	Participant stops touching screen
102.961	Robot ends description
110.102	and below a residence
110.102	Robot begins description
111.57	Robot ends description
116.402	Participant starts touching screen
116.691	Robot begins description
116.692	nope
117.408	Robot ends description
118.444	Participant stops touching screen
119.541	Participant starts touching screen
120.741	a hospital is above a police department
120.741	Robot begins description
120.824	Participant stops touching screen
123.379	Robot ends description
124.006	Participant starts touching screen
126.173	Participant stops touching screen
127.089	Participant starts touching screen
130.173	Participant stops touching screen
131.659	Robot begins description
131.659	right
132.172	Fourth object is successfully placed.
132.328	Robot ends description
135.032	Robot begins description
135.032	a residence is above a police department
137.652	Robot ends description
143.281	Participant starts touching screen
143.603	Robot begins description
143.603	yup
144.169	Robot ends description
145.236	Participant stops touching screen
147.244	Fifth object is successfully placed
150.073	Robot begins description
150.073	a manor is above a police department
152.511	Robot ends description
155.47	Participant starts touching screen
156.786	Robot begins description
156.788	and below a residence
158.266	Robot ends description
159.266	Participant stops touching screen
164.33	Robot begins description
164.33	and below a residence
165.76	Robot ends description
165.793	Participant starts touching screen
168.331	Participant stops touching screen
168.731	Robot begins description
168.731	yes
169.514	Robot ends description
170.332	Sixth object is successfully placed.
171.982	Robot begins description
171.982	the power plant is above a residence
174.47	Robot ends description
176.822	Robot begins description
176.822	and below a church
176.905	Participant starts touching screen
178.117	Robot ends description
181.511	Participant stops touching screen
181.6	Participant starts touching screen
181.632	yes
181.632	Robot begins description
182.395	Robot ends description
183.528	Participant stops touching screen
185.516	Seventh object is successfully placed
185.516	Round 1 Ends
301.677	Round 2 Begins – Non-Ambiguous
302.086	Robot begins description
302.087	a residence is above a police department
304.592	Robot ends description
307.264	Participant starts touching screen
308.203	Participant stops touching screen
310.188	First object is successfully placed.
312.297	Robot begins description
312.297	a manor is above a fire department, to the right of a residence and to the left of a residence
317.77	Robot ends description
318.59	Participant starts touching screen
321.25	Participant stops touching screen
323.26	Second object is successfully placed.
325.4	Robot begins description
325.401	a residence is above a fire department and to the right of the factory
329.401	Robot ends description
331.51	Participant starts touching screen
333.997	Participant stops touching screen
335.377	Robot begins description
335.377	a residence is above a fire department and to the right of the factory
336.012	Third object is successfully placed.
336.607	Robot ends description
338.056	Robot begins description
338.056	a commercial district is above a hospital and below an empty space
341.959	Robot ends description
344.323	Participant starts touching screen
346.562	Participant stops touching screen
348.072	Robot begins description
348.072	a commercial district is above a hospital and below an empty space
348.572	Fourth object is successfully placed.
349.409	Robot ends description
351.641	Robot begins description
351.641	a police department is above a commercial district, to the right of a residence, below a fire department and to the left of a hospital
357.364	Participant starts touching screen
359.059	Robot ends description
360.409	Participant stops touching screen
362.396	Fifth object is successfully placed
364.449	Robot begins description
364.451	a police department is above a commercial district, to the right of a residence and to the left of a hospital
369.51	Participant starts touching screen
370.356	Robot ends description
372.04	Participant stops touching screen
374.028	Sixth object is successfully placed.
376.126	Robot begins description
376.126	a church is above a fire department
378.503	Robot ends description
380.525	Participant starts touching screen
383.021	Participant stops touching screen
385.036	success
385.037	Round 2 Ends.
385.037	End of Interaction.
